# Supplementary material
Source: PubMed Central journal article supplement (PMC5865017)
Supplement: IAI.00869-17_zii999092359s1.pdf [file IAI.00869-17_zii999092359s1.pdf]

**Table S1.** Basic source information and accession numbers for deficient isolates and 148 Fha-producing isolates used for mutation identification.

| Strain ID | Source  | Year | Fha ECL <sup>a</sup> | Prn ECL <sup>b</sup> | Pt ECL <sup>c</sup> | Accession  | EPS <sup>d</sup> | Duplication <sup>e</sup> | Reference  |
|-----------|---------|------|----------------------|----------------------|---------------------|------------|------------------|--------------------------|------------|
| B199      | FDA 105 | 1935 | Neg                  | Pos                  | Pos                 | SRS2357476 |                  |                          | This study |
| C958      | USA: NJ | 2001 | Pos                  | Pos                  | Pos                 | SRS1832432 |                  |                          | (1)        |
| E024      | USA: MD | 2003 | Pos                  | Pos                  | Pos                 | SRS1832551 |                  |                          | (1)        |
| E150      | USA: OH | 2003 | Pos                  | Pos                  | Pos                 | SRS1832535 |                  |                          | (1)        |
| F011      | USA: NE | 2005 | Pos                  | Pos                  | Pos                 | SRS1832396 |                  |                          | (1)        |
| F658      | USA: CO | 2008 | Pos                  | Pos                  | Pos                 | SRS1832471 |                  |                          | (1)        |
| F670      | USA: WA | 2003 | Pos                  | Pos                  | Pos                 | SRS1832508 |                  |                          | (1)        |
| H320      | USA: FL | 2009 | Pos                  | Pos                  | Pos                 | SRS1832510 |                  |                          | (1)        |
| H627      | USA: CA | 2010 | Pos                  | Pos                  | Pos                 | SRS1324858 |                  |                          | (2)        |
| H920      | USA: WA | 2011 | Pos                  | Neg                  | Pos                 | SRS2357489 |                  |                          | This study |
| I743      | USA: MN | 2013 | Pos                  | Neg                  | Pos                 | SRS1832416 | yes              |                          | (1)        |
| I747      | USA: MN | 2012 | Pos                  | Neg                  | Pos                 | SRS2357500 | yes              | B199                     | This study |
| I751      | USA: CT | 2012 | Pos                  | Pos                  | Pos                 | SRS1832383 | yes              |                          | (1)        |
| I752      | USA: CT | 2013 | Pos                  | Pos                  | Pos                 | SRS1832485 | yes              |                          | (1)        |
| I754      | USA: CT | 2013 | Pos                  | Neg                  | Pos                 | SRS1832502 | yes              |                          | (1)        |
| I755      | USA: NY | 2013 | Pos                  | Neg                  | Pos                 | SRS1832582 | yes              |                          | (1)        |
| I762      | USA: NY | 2013 | Pos                  | Neg                  | Pos                 | SRS1832559 | yes              |                          | (1)        |
| I944      | USA: CA | 2013 | Pos                  | Pos                  | Pos                 | SRS1832476 |                  |                          | (1)        |
| I955      | USA: CA | 2013 | Pos                  | Neg                  | Pos                 | SRS2357474 |                  |                          | This study |
| I958      | USA: NM | 2013 | Pos                  | Neg                  | Pos                 | SRS2357499 | yes              |                          | This study |
| I959      | USA: OR | 2013 | Pos                  | Neg                  | Pos                 | SRS1832573 | yes              |                          | (1)        |
| I965      | USA: CO | 2013 | Pos                  | Neg                  | Pos                 | SRS1832552 | yes              | J042                     | (1)        |
| I968      | USA: CO | 2013 | Pos                  | Neg                  | Pos                 | SRS1832479 | yes              |                          | (1)        |
| I975      | USA: NY | 2013 | Pos                  | Neg                  | Pos                 | SRS1832398 | yes              |                          | (1)        |
| I976      | USA: NY | 2013 | Pos                  | Neg                  | Pos                 | SRS1832434 | yes              |                          | (1)        |
| I977      | USA: NY | 2013 | Pos                  | Neg                  | Pos                 | SRS1832511 | yes              |                          | (1)        |
| I978      | USA: NY | 2013 | Pos                  | Neg                  | Pos                 | SRS1832523 | yes              |                          | (1)        |
| I979      | USA: NY | 2013 | Pos                  | Neg                  | Neg                 | SRS1324875 | yes              |                          | (3)        |
| J010      | USA: CT | 2013 | Pos                  | Neg                  | Pos                 | SRS1832483 | yes              |                          | (1)        |
| J012      | USA: MN | 2013 | Pos                  | Neg                  | Pos                 | SRS1832494 | yes              |                          | (1)        |
| J013      | USA: MN | 2013 | Pos                  | Neg                  | Pos                 | SRS1832413 | yes              |                          | (1)        |
| J014      | USA: MN | 2014 | Neg                  | Neg                  | Pos                 | SRS2357481 | yes              |                          | This study |
| J016      | USA: MN | 2013 | Pos                  | Neg                  | Pos                 | SRS1832553 | yes              |                          | (1)        |
| J018      | USA: MN | 2013 | Pos                  | Neg                  | Pos                 | SRS1832408 | yes              |                          | (1)        |
| J019      | USA: MN | 2013 | Pos                  | Neg                  | Pos                 | SRS1832572 | yes              |                          | (1)        |
| J021      | USA: OR | 2013 | Pos                  | Neg                  | Pos                 | SRS1832544 | yes              |                          | (1)        |
| J022      | USA: OR | 2013 | Pos                  | Neg                  | Pos                 | SRS1832390 | yes              |                          | (1)        |
| J023      | USA: OR | 2013 | Pos                  | Neg                  | Pos                 | SRS1832399 | yes              |                          | (1)        |
| J024      | USA: NY | 2013 | Pos                  | Pos                  | Pos                 | SRS2357448 | yes              |                          | This study |
| J027      | USA: CO | 2013 | Pos                  | Neg                  | Pos                 | SRS1832594 | yes              |                          | (1)        |
| J029      | USA: CO | 2013 | Pos                  | Pos                  | Pos                 | SRS2357509 | yes              | J042                     | This study |
| J030      | USA: CO | 2013 | Pos                  | Neg                  | Pos                 | SRS1832564 | yes              |                          | (1)        |
| J042      | NIH 325 | 1947 | Neg                  | Pos                  | Pos                 | SRS2357480 |                  |                          | This study |

## Supplemental Material

|      |         |      |     |     |     |            |     |      |            |
|------|---------|------|-----|-----|-----|------------|-----|------|------------|
| J043 | NIH 326 | 1947 | Neg | Neg | Neg | SRS2357496 |     |      | This study |
| J066 | USA: CT | 2013 | Pos | Neg | Pos | SRS2357446 | yes |      | This study |
| J068 | USA: CT | 2013 | Pos | Neg | Pos | SRS1832376 | yes |      | (1)        |
| J072 | USA: OR | 2013 | Pos | Neg | Pos | SRS1832591 | yes |      | (1)        |
| J073 | USA: OR | 2013 | Pos | Neg | Pos | SRS1832580 | yes |      | (1)        |
| J074 | USA: NM | 2013 | Pos | Neg | Pos | SRS2357487 | yes |      | This study |
| J076 | USA: NM | 2013 | Pos | Neg | Pos | SRS1832426 | yes |      | (1)        |
| J077 | USA: MN | 2013 | Pos | Neg | Pos | SRS2357470 | yes |      | This study |
| J078 | USA: MN | 2013 | Pos | Neg | Pos | SRS2357461 | yes |      | This study |
| J081 | USA: MN | 2013 | Pos | Neg | Pos | SRS2357475 | yes |      | This study |
| J083 | USA: CO | 2013 | Pos | Neg | Pos | SRS2357507 | yes | J042 | This study |
| J085 | USA: CO | 2013 | Pos | Neg | Pos | SRS2357490 | yes | J042 | This study |
| J090 | USA: CO | 2013 | Pos | Neg | Pos | SRS1832414 | yes |      | (1)        |
| J091 | USA: CO | 2014 | Pos | Neg | Pos | SRS1832574 | yes |      | (1)        |
| J093 | USA: DE | 2014 | Pos | Neg | Pos | SRS1832593 |     |      | (1)        |
| J094 | USA: GA | 2014 | Pos | Neg | Pos | SRS2357488 | yes |      | This study |
| J096 | USA: CO | 2014 | Pos | Neg | Pos | SRS1832404 | yes |      | (1)        |
| J097 | USA: CO | 2014 | Pos | Neg | Pos | SRS1832445 |     |      | (1)        |
| J098 | USA: NM | 2014 | Pos | Pos | Pos | SRS1832571 | yes |      | (1)        |
| J099 | USA: OR | 2014 | Pos | Neg | Pos | SRS1832442 | yes |      | (1)        |
| J100 | USA: OR | 2014 | Pos | Neg | Pos | SRS1832595 | yes |      | (1)        |
| J103 | USA: MN | 2014 | Pos | Neg | Pos | SRS1832389 | yes |      | (1)        |
| J104 | USA: MN | 2014 | Pos | Neg | Pos | SRS1832505 | yes |      | (1)        |
| J105 | USA: MN | 2014 | Pos | Neg | Pos | SRS1832563 | yes |      | (1)        |
| J106 | USA: MN | 2014 | Pos | Neg | Pos | SRS2357467 | yes |      | This study |
| J107 | USA: MN | 2014 | Pos | Neg | Pos | SRS1832545 | yes |      | (1)        |
| J108 | USA: MN | 2014 | Pos | Neg | Pos | SRS2357443 | yes |      | This study |
| J109 | USA: MN | 2014 | Pos | Neg | Pos | SRS2357462 | yes |      | This study |
| J110 | USA: MN | 2014 | Pos | Neg | Pos | SRS1832458 | yes |      | (1)        |
| J111 | USA: MN | 2014 | Pos | Neg | Pos | SRS2357435 | yes |      | This study |
| J112 | USA: NY | 2014 | Pos | Neg | Pos | SRS2357458 | yes |      | This study |
| J113 | USA: NY | 2014 | Pos | Neg | Pos | SRS2357451 | yes |      | This study |
| J114 | USA: NY | 2014 | Pos | Neg | Pos | SRS2357477 |     |      | This study |
| J115 | USA: NY | 2014 | Pos | Neg | Pos | SRS1832492 | yes |      | (1)        |
| J131 | USA: CA | 2014 | Pos | Neg | Pos | SRS2357456 |     |      | This study |
| J148 | USA: OR | 2014 | Pos | Neg | Pos | SRS2357472 | yes |      | This study |
| J149 | USA: OR | 2014 | Pos | Neg | Pos | SRS1832528 | yes |      | (1)        |
| J150 | USA: OR | 2014 | Pos | Neg | Pos | SRS2357485 | yes |      | This study |
| J151 | USA: OR | 2014 | Pos | Neg | Pos | SRS2357454 | yes |      | This study |
| J152 | USA: MN | 2014 | Pos | Neg | Pos | SRS1832452 | yes |      | (1)        |
| J153 | USA: MN | 2014 | Pos | Neg | Pos | SRS2357447 | yes |      | This study |
| J154 | USA: MN | 2014 | Pos | Neg | Pos | SRS2357468 | yes |      | This study |
| J155 | USA: MN | 2014 | Pos | Neg | Pos | SRS1832422 | yes |      | (1)        |
| J157 | USA: MN | 2014 | Pos | Neg | Pos | SRS2357437 | yes |      | This study |
| J159 | USA: MN | 2014 | Pos | Neg | Pos | SRS1832386 | yes |      | (1)        |
| J160 | USA: MN | 2014 | Pos | Neg | Pos | SRS2357466 | yes |      | This study |
| J161 | USA: MN | 2014 | Pos | Neg | Pos | SRS1832503 | yes |      | (1)        |

## Supplemental Material

|      |         |      |     |     |     |            |     |            |
|------|---------|------|-----|-----|-----|------------|-----|------------|
| J162 | USA: GA | 2014 | Pos | Neg | Pos | SRS1832496 | yes | (1)        |
| J163 | USA: GA | 2014 | Pos | Neg | Pos | SRS2357505 | yes | This study |
| J164 | USA: GA | 2014 | Pos | Neg | Pos | SRS2357493 |     | This study |
| J165 | USA: NY | 2014 | Pos | Neg | Pos | SRS2357498 | yes | This study |
| J170 | USA: CO | 2014 | Pos | Neg | Pos | SRS2357455 | yes | This study |
| J171 | USA: CO | 2014 | Pos | Neg | Pos | SRS2357473 |     | This study |
| J172 | USA: CO | 2014 | Pos | Neg | Pos | SRS2357457 | yes | This study |
| J173 | USA: CO | 2014 | Pos | Neg | Pos | SRS2357464 | yes | This study |
| J174 | USA: CO | 2014 | Pos | Neg | Pos | SRS1832526 | yes | (1)        |
| J175 | USA: CO | 2014 | Pos | Neg | Pos | SRS1832447 | yes | (1)        |
| J177 | USA: CO | 2014 | Pos | Neg | Pos | SRS2357504 | yes | This study |
| J178 | USA: CO | 2014 | Pos | Neg | Pos | SRS1832443 | yes | (1)        |
| J179 | USA: CO | 2014 | Pos | Neg | Pos | SRS1832388 | yes | (1)        |
| J191 | USA: IN | 2014 | Pos | Neg | Pos | SRS1832498 |     | (1)        |
| J192 | USA: OR | 2014 | Pos | Neg | Pos | SRS1832518 | yes | (1)        |
| J193 | USA: CO | 2014 | Pos | Neg | Pos | SRS1832531 | yes | (1)        |
| J194 | USA: CO | 2014 | Pos | Neg | Pos | SRS1832550 | yes | (1)        |
| J195 | USA: CO | 2014 | Pos | Neg | Pos | SRS2357450 | yes | This study |
| J197 | USA: CO | 2014 | Pos | Neg | Pos | SRS1832375 | yes | (1)        |
| J198 | USA: CO | 2014 | Pos | Pos | Pos | SRS1832436 | yes | (1)        |
| J199 | USA: CO | 2014 | Neg | Neg | Pos | SRS2357506 | yes | This study |
| J201 | USA: CO | 2014 | Pos | Neg | Pos | SRS1832412 | yes | (1)        |
| J202 | USA: CO | 2014 | Pos | Neg | Pos | SRS2357444 | yes | This study |
| J203 | USA: GA | 2014 | Pos | Neg | Pos | SRS2357503 | yes | This study |
| J204 | USA: GA | 2014 | Pos | Pos | Pos | SRS2357478 |     | This study |
| J205 | USA: GA | 2014 | Pos | Neg | Pos | SRS2357438 |     | This study |
| J206 | USA: NY | 2014 | Pos | Neg | Pos | SRS1832392 | yes | (1)        |
| J207 | USA: NY | 2014 | Pos | Neg | Pos | SRS2357486 | yes | This study |
| J208 | USA: NY | 2014 | Pos | Neg | Pos | SRS1832477 | yes | (1)        |
| J209 | USA: NY | 2014 | Pos | Neg | Pos | SRS2357491 | yes | This study |
| J210 | USA: NY | 2014 | Pos | Neg | Pos | SRS1832549 | yes | (1)        |
| J222 | USA: MN | 2014 | Pos | Neg | Pos | SRS2357469 | yes | This study |
| J223 | USA: MN | 2014 | Pos | Neg | Pos | SRS2357440 | yes | This study |
| J224 | USA: MN | 2014 | Pos | Neg | Pos | SRS2357479 | yes | This study |
| J225 | USA: MN | 2014 | Pos | Neg | Pos | SRS1832401 | yes | (1)        |
| J226 | USA: MN | 2014 | Pos | Neg | Pos | SRS2357436 | yes | This study |
| J227 | USA: MN | 2014 | Pos | Neg | Pos | SRS2357483 | yes | This study |
| J228 | USA: MN | 2014 | Pos | Neg | Pos | SRS2357441 | yes | This study |
| J229 | USA: MN | 2014 | Pos | Neg | Pos | SRS2357449 | yes | This study |
| J230 | USA: MN | 2014 | Pos | Neg | Pos | SRS2357508 | yes | This study |
| J246 | USA: VT | 2014 | Pos | Neg | Pos | SRS2357452 |     | This study |
| J247 | USA: VT | 2014 | Pos | Neg | Pos | SRS2357471 |     | This study |
| J248 | USA: VT | 2014 | Pos | Pos | Pos | SRS2357501 |     | This study |
| J276 | USA: OR | 2014 | Pos | Neg | Pos | SRS1832384 | yes | (1)        |
| J277 | USA: OR | 2014 | Pos | Neg | Pos | SRS1832538 | yes | (1)        |
| J286 | USA: WI | 2014 | Pos | Neg | Pos | SRS2357465 |     | This study |
| J288 | USA: WI | 2014 | Pos | Neg | Pos | SRS2357460 |     | This study |

B199

Supplemental Material

|      |         |      |     |     |     |            |     |            |
|------|---------|------|-----|-----|-----|------------|-----|------------|
| J294 | USA: MN | 2014 | Pos | Neg | Pos | SRS2357502 | yes | This study |
| J295 | USA: CT | 2014 | Pos | Neg | Pos | SRS2357463 | yes | This study |
| J296 | USA: CT | 2014 | Pos | Neg | Pos | SRS1832450 | yes | (1)        |
| J298 | USA: CO | 2014 | Pos | Neg | Pos | SRS2357459 | yes | This study |
| J299 | USA: CO | 2014 | Pos | Neg | Pos | SRS2357492 | yes | This study |
| J300 | USA: CO | 2014 | Pos | Neg | Pos | SRS1832500 | yes | (1)        |
| J301 | USA: CO | 2014 | Pos | Neg | Pos | SRS2357484 |     | This study |
| J302 | USA: CO | 2014 | Pos | Neg | Pos | SRS2357482 |     | This study |
| J303 | USA: CO | 2014 | Pos | Neg | Pos | SRS2357495 |     | This study |
| J304 | USA: GA | 2014 | Pos | Neg | Pos | SRS2357497 | yes | This study |
| J305 | USA: NY | 2014 | Pos | Neg | Pos | SRS1832490 | yes | (1)        |
| J306 | USA: NY | 2014 | Pos | Neg | Pos | SRS2357439 | yes | This study |
| J308 | USA: NY | 2014 | Pos | Neg | Pos | SRS2357442 | yes | This study |
| J309 | USA: NY | 2014 | Pos | Neg | Pos | SRS2357494 | yes | This study |
| J310 | USA: NY | 2014 | Pos | Neg | Pos | SRS2357445 | yes | This study |
| J311 | USA: NY | 2014 | Pos | Neg | Pos | SRS1832373 |     | (1)        |
| J365 | USA: CA | 2014 | Pos | Neg | Neg | SRS2357453 |     | This study |

<sup>a</sup> Fha production measured by ECL assay.

<sup>b</sup> Prn production measured by ECL assay.

<sup>c</sup> Pt production measured by ECL assay.

<sup>d</sup> Isolates collected through Enhanced Pertussis Surveillance (4).

<sup>e</sup> Putative duplications inferred from high sequencing read coverage in same genomic region as observed in Fha-deficient isolates B199 or J042.

Abbreviations: Pos, positive; Neg, negative.

a.

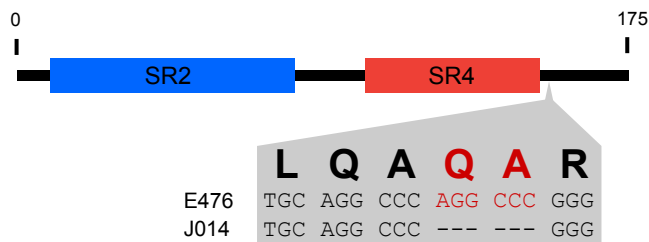

b.

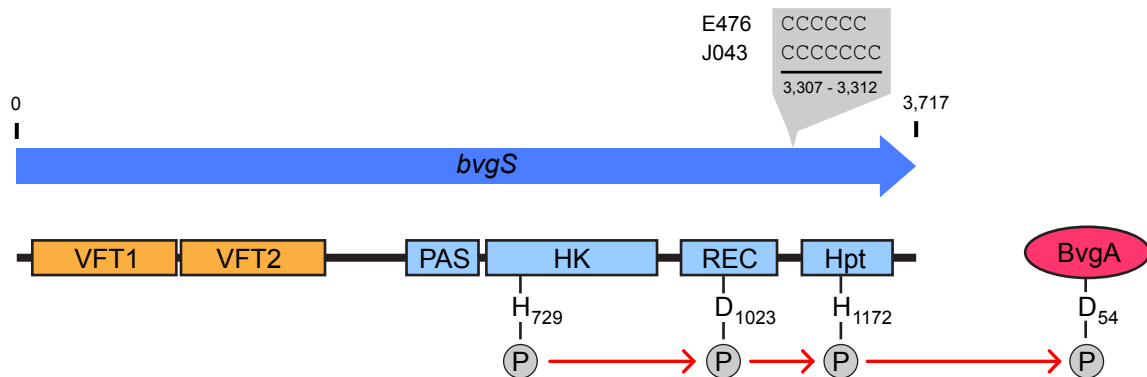

c.

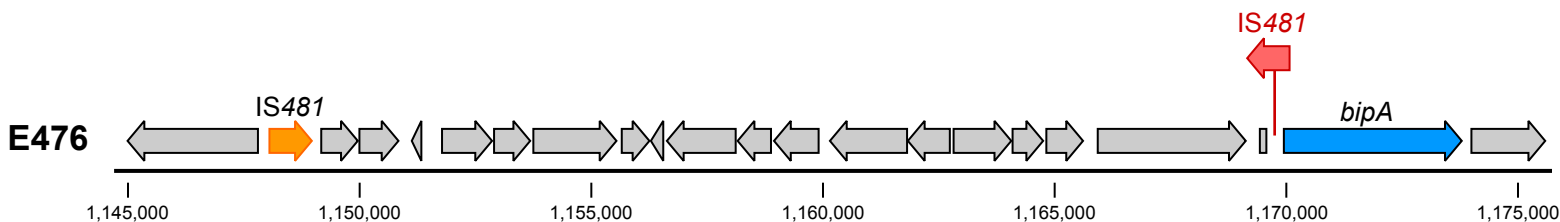

**Figure S1.** [a] Predicted domain structure of the ECF-sigma factor (RD\_14675) and the in-frame deletion of two amino acids at position 160 observed in J014. [b] The multidomain structure of BvgS includes two periplasmic venus flytrap (VFT) domains connected to the cytosolic PAS, histidine kinase (HK), receiver (Rec), and histidine phosphoryl transfer (Hpt) domains. An insertion with a homopolymeric tract upstream of the Hpt domain was observed in J043 which likely disrupted phosphorelay to BvgA. [c] Predicted gene organization near *bipA* in the reference strain E476 (CP010964). *IS481* insertion in the 5'-UTR (red) and subsequent inversion with an existing *IS481* copy ~20 kb upstream (orange) disrupted the complex *bipA* promoter region in J042.

## References

1. Weigand MR, Peng Y, Loparev V, Batra D, Bowden KE, Burroughs M, Cassidy PK, Davis JK, Johnson T, Juieng P, Knipe K, Mathis MH, Pruitt AM, Rowe L, Sheth M, Tondella ML, Williams MM. 2017. The History of *Bordetella pertussis* Genome Evolution Includes Structural Rearrangement. *J Bacteriol* **199**:e00806-00816.
2. Bowden KE, Weigand MR, Peng Y, Cassidy PK, Sammons S, Knipe K, Rowe LA, Loparev V, Sheth M, Weening K, Tondella ML, Williams MM. 2016. Genome Structural Diversity among 31 *Bordetella pertussis* Isolates from Two Recent U.S. Whooping Cough Statewide Epidemics. *mSphere* **1**:e00036-00016.
3. Williams MM, Sen K, Weigand MR, Skoff TH, Cunningham VA, Halse TA, Tondella ML, Group CDCPW. 2016. *Bordetella pertussis* Strain Lacking Pertactin and Pertussis Toxin. *Emerg Infect Dis* **22**:319-322.
4. Skoff TH, Baumbach J, Cieslak PR. 2015. Tracking Pertussis and Evaluating Control Measures through Enhanced Pertussis Surveillance, Emerging Infections Program, United States. *Emerg Infect Dis* **21**:1568-1573.
